# Supplementary material for: ANKRD1 Facilitates Tumor Progression and Immune Evasion in Stomach Adenocarcinoma through STAT3 Activation and Remodeling of the Tumor Microenvironment
Source: Research Square preprint supplement (doi:10.21203/rs.3.rs-7782118/v1), 2025-12-19
Supplement: Supplementary file 2 [file f5b9fb18edb09c2fff70c97b.docx]

Table S1 Primary antibodies and conditions

| Antibody | Product No. | Biological source | Source |
| --- | --- | --- | --- |
| ANKRD1 | ab124527 | Rabbit | Abcam,USA |
| GAPDH | 2118T | Rabbit | Proteintech , CHN |
| p-STAT3 | 28945-1-AP | Rabbit | Proteintech,CHN |
| STAT3 | 10253-2-AP | Rabbit | Proteintech,CHN |
| HRP Goat Anti-Rabbit IgG (H+L) | 7074 | Rabbit | Cell Signaling ,USA |
